# Supplementary material for: Escalating combinations of enhanced infectivity and immune escape define SARS-CoV-2 Omicron lineage replacement
Source: bioRxiv or medRxiv preprint supplement (doi:10.1101/2024.01.03.24300790), 2024-01-04
Supplement: Supplementary file [file media-1.pdf]

# Supplement

**Supplementary Table 1 Emergence periods for Growth advantage calculation**

| <b>Dominant Variant</b> | <b>Incoming Variant</b> | <b>Start</b>     | <b>End</b>       |
|-------------------------|-------------------------|------------------|------------------|
| Delta                   | BA.1                    | Dec 15 2021      | Dec 22 2021      |
| BA.1                    | BA.2                    | March 6 2022     | March 20 2022    |
| BA.2                    | BA.4/5                  | June 18 2022     | July 2 2022      |
| BA.5                    | XBB                     | December 16 2022 | December 30 2022 |

**Supplementary Table 2 Emergence periods for Ct value comparison**

| <b>Dominant Variant</b> | <b>Incoming Variant</b> | <b>Start</b>     | <b>Crossover</b> | <b>End</b>       |
|-------------------------|-------------------------|------------------|------------------|------------------|
| BA.1                    | BA.2                    | February 27 2022 | March 13 2022    | March 27 2022    |
| BA.2                    | BA.4/5                  | June 11 2022     | June 25 2022     | July 09 2022     |
| BA.5                    | XBB                     | December 03 2022 | December 17 2022 | December 31 2022 |

**Supplementary Table 3 Emergence periods for vaccine breakthrough infections comparison**

| <b>Dominant Variant</b> | <b>Incoming Variant</b> | <b>Start</b>     | <b>End</b>      |
|-------------------------|-------------------------|------------------|-----------------|
| Delta                   | BA.1                    | November 30 2021 | January 04 2022 |
| BA.1                    | BA.2                    | February 23 2022 | March 30 2022   |
| BA.2                    | BA.4/5                  | June 09 2022     | July 14 2022    |
| BA.5                    | XBB                     | December 07 2022 | January 11 2023 |

**Supplementary Table 4: Patient demographics by Vaccination Status (n = 14246)**

|                  | <b>Unvaccinated<br/>(n=7234)</b> | <b>1 dose<br/>(n=972)</b> | <b>2+ doses<br/>≥ 5 months<br/>(n=4688)</b> | <b>2+ doses<br/>&lt; 5 months<br/>(n=1352)</b> | <b>Overall<br/>(n=14246)</b> |
|------------------|----------------------------------|---------------------------|---------------------------------------------|------------------------------------------------|------------------------------|
| <b>Age group</b> |                                  |                           |                                             |                                                |                              |
| 5-17             | 2051 (28.4%)                     | 49 (5.0%)                 | 222 (4.7%)                                  | 124 (9.2%)                                     | 2446<br>(17.2%)              |
| 18-39            | 2635 (36.4%)                     | 327<br>(33.6%)            | 1197<br>(25.5%)                             | 403 (29.8%)                                    | 4562<br>(32.0%)              |
| 40-64            | 1999 (27.6%)                     | 453<br>(46.6%)            | 2045<br>(43.6%)                             | 558 (41.3%)                                    | 5055<br>(35.5%)              |
| 65+              | 549 (7.6%)                       | 143<br>(14.7%)            | 1224<br>(26.1%)                             | 267 (19.7%)                                    | 2183<br>(15.3%)              |
| <b>Sex</b>       |                                  |                           |                                             |                                                |                              |
| Female           | 3273 (45.2%)                     | 464<br>(47.7%)            | 2346<br>(50.0%)                             | 743 (55.0%)                                    | 6826<br>(47.9%)              |
| Male             | 3157 (43.6%)                     | 413<br>(42.5%)            | 1744<br>(37.2%)                             | 538 (39.8%)                                    | 5852<br>(41.1%)              |
| Other            | 21 (0.3%)                        | 1 (0.1%)                  | 12 (0.3%)                                   | 0 (0%)                                         | 34 (0.2%)                    |
| Unknown          | 783 (10.8%)                      | 94 (9.7%)                 | 586 (12.5%)                                 | 71 (5.3%)                                      | 1534<br>(10.8%)              |

**Supplementary Table 5: Delta Emergence Model**

| <b>Covariates</b>         | <b>Odds ratio (e<sup>β</sup>, 95% CI)</b> | <b>p-value</b> |
|---------------------------|-------------------------------------------|----------------|
| <b>Vaccination status</b> |                                           |                |
| Unvaccinated              | Ref.                                      | Ref.           |
| One dose                  | NA                                        | NA             |
| 2+ doses ≥ 5 months       | 0.302 (0.017, 5.481)                      | 0.418          |
| 2+ doses < 5 months       | 2.533 (0.381, 16.818)                     | 0.336          |
| <b>Age category</b>       |                                           |                |
| 18-39                     | Ref.                                      | Ref.           |
| 5-17                      | 0.573 (0.135, 2.444)                      | 0.452          |
| 40-64                     | 1.106 (0.296, 4.131)                      | 0.881          |
| 65+                       | 0.083 (0.008, 0.814)                      | 0.033          |
| <b>Sex</b>                |                                           |                |
| Male                      | Ref.                                      | Ref.           |
| Female                    | 1.689 (0.562, 5.074)                      | 0.350          |
| <b>Time</b>               | 3.898 (2.023, 7.511)                      | <0.001         |

**Supplementary Table 6: BA.1 Emergence Model**

| <b>Covariates</b>         | <b>Odds ratio (e<sup>β</sup>, 95% CI)</b> | <b>p-value</b> |
|---------------------------|-------------------------------------------|----------------|
| <b>Vaccination status</b> |                                           |                |
| Unvaccinated              | Ref.                                      | Ref.           |
| One dose                  | 0.651 (0.262, 1.621)                      | 0.357          |
| 2+ doses ≥ 5 months       | 1.917 (1.033, 3.558)                      | 0.0393         |
| 2+ doses < 5 months       | 1.320 (0.507, 3.440)                      | 0.570          |
| <b>Age category</b>       |                                           |                |
| 18-39                     | Ref.                                      | Ref.           |
| 5-17                      | 0.280 (0.131, 0.598)                      | 0.001          |
| 40-64                     | 0.471 (0.258, 0.861)                      | 0.014          |
| 65+                       | 0.365 (0.146, 0.912)                      | 0.031          |
| <b>Sex</b>                |                                           |                |
| Male                      | Ref.                                      | Ref.           |
| Female                    | 0.956 (0.574, 1.592)                      | 0.863          |
| <b>Time</b>               | 50.430 (27.761, 91.611)                   | <0.001         |

**Supplementary Table 7: BA.2 Emergence Model**

| <b>Covariates</b>         | <b>Odds ratio (e<sup>β</sup>, 95% CI)</b> | <b>p-value</b> |
|---------------------------|-------------------------------------------|----------------|
| <b>Vaccination status</b> |                                           |                |
| Unvaccinated              | Ref.                                      | Ref.           |
| One dose                  | 1.558 (0.739, 3.285)                      | 0.244          |
| 2+ doses ≥ 5 months       | 1.308 (0.830, 2.061)                      | 0.247          |
| 2+ doses < 5 months       | 1.089 (0.677, 1.752)                      | 0.724          |
| <b>Age category</b>       |                                           |                |
| 18-39                     | Ref.                                      | Ref.           |
| 5-17                      | 1.087 (0.614, 1.926)                      | 0.775          |
| 40-64                     | 1.003 (0.652, 1.542)                      | 0.989          |
| 65+                       | 1.251 (0.673, 2.327)                      | 0.479          |
| <b>Sex</b>                |                                           |                |
| Male                      | Ref.                                      | Ref.           |
| Female                    | 1.066 (0.745, 1.526)                      | 0.727          |
| <b>Time</b>               |                                           | <0.001         |

**Supplementary Table 8: BA.4/5 Emergence Model**

| <b>Covariates</b>         | <b>Odds ratio (e<sup>β</sup>, 95% CI)</b> | <b>p-value</b> |
|---------------------------|-------------------------------------------|----------------|
| <b>Vaccination status</b> |                                           |                |
| Unvaccinated              | Ref.                                      | Ref.           |
| One dose                  | 0.834 (0.380, 1.835)                      | 0.653          |
| 2+ doses ≥ 5 months       | 1.214 (0.791, 1.863)                      | 0.374          |
| 2+ doses < 5 months       | 2.441 (0.995, 5.988)                      | 0.051          |
| <b>Age category</b>       |                                           |                |
| 18-39                     | Ref.                                      | Ref.           |
| 5-17                      | 0.782 (0.396, 1.546)                      | 0.480          |
| 40-64                     | 0.858 (0.551, 1.335)                      | 0.497          |
| 65+                       | 0.630 (0.373, 1.062)                      | 0.083          |
| <b>Time</b>               | 2.924 (2.363, 3.617)                      | <0.001         |

**Supplementary Table 9: XBB.1.5 Emergence Model**

| <b>Covariates</b>         | <b>Odds ratio (e<sup>β</sup>, 95% CI)</b> | <b>p-value</b> |
|---------------------------|-------------------------------------------|----------------|
| <b>Vaccination status</b> |                                           |                |
| Unvaccinated              | Ref.                                      | Ref.           |
| One dose                  | 0.677 (0.251, 1.830)                      | 0.442          |
| 2+ doses ≥ 5 months       | 0.586 (0.339, 1.013)                      | 0.056          |
| 2+ doses < 5 months       | 2.690 (0.405, 17.859)                     | 0.306          |
| <b>Age category</b>       |                                           |                |
| 18-39                     | Ref.                                      | Ref.           |
| 5-17                      | 0.538 (0.218, 1.326)                      | 0.178          |
| 40-64                     | 0.575 (0.313, 1.056)                      | 0.075          |
| 65+                       | 0.539 (0.290, 0.999)                      | 0.0497         |
| <b>Sex</b>                |                                           |                |
| Male                      | Ref.                                      | Ref.           |
| Female                    | 1.372 (0.865, 2.177)                      | 0.179          |
| <b>Time</b>               | 2.251 (1.765, 2.872)                      | <0.001         |

**Supplementary Table 10: Vaccination Strata by Emergence Period**

---

| Emerging Variant          | Delta | BA.1 | BA.2 | BA.4/5 | XBB |
|---------------------------|-------|------|------|--------|-----|
| <b>Vaccination Status</b> |       |      |      |        |     |
| Unvaccinated              | 72    | 293  | 213  | 174    | 101 |
| One dose                  | 3     | 82   | 50   | 41     | 24  |
| 2+ doses $\geq$ 5 months  | 2     | 376  | 234  | 378    | 240 |
| 2+ doses < 5 months       | 9     | 78   | 181  | 36     | 6   |
| Total                     | 86    | 829  | 678  | 629    | 371 |

---



# Supplementary Figure 1

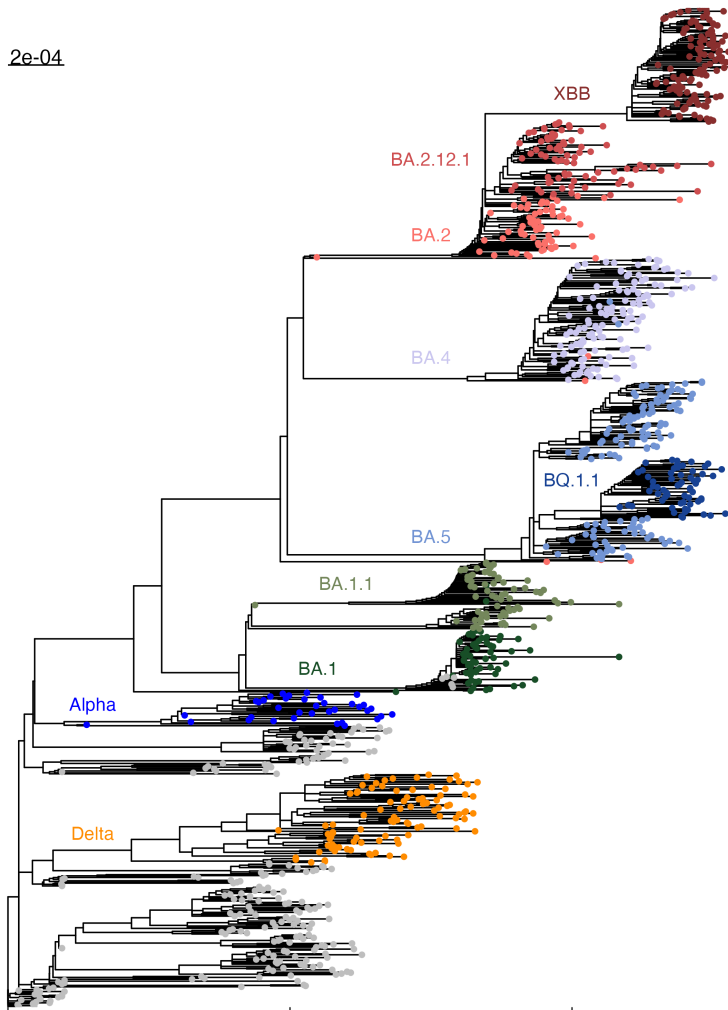

**Figure S1 Phylogenetic tree representing the genetic distance of different variants of concern as well as the Omicron lineages BA.1, BA.2, BA.4., BA.5 and XBB described in this study.** The tree is based on a sub-sampling of 1000 samples primarily subsampled from the Yale-SARS-CoV-2 genomic surveillance initiative including some international reference sequences. The tree is rooted in the Wuhan-Hu1 sample. Across the Omicron family, a remarkable degree of convergent intra-lineage evolution has led to the emergence of at least one major sub-lineage. This is most clearly exemplified in the independent acquisition of amino acid changes at the same positions in the Spike region (e.g. BA.1.1 (R346K), BA.4.6 (R346T) and BQ.1.1 (R346T)).

# Supplementary Figure 2

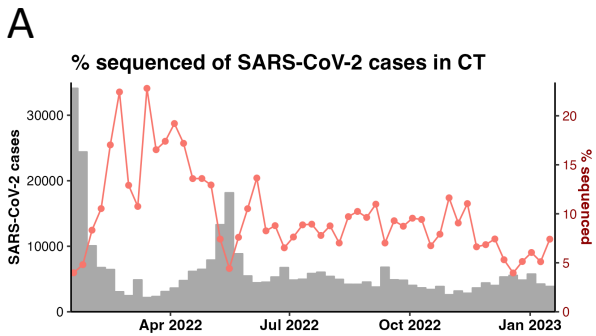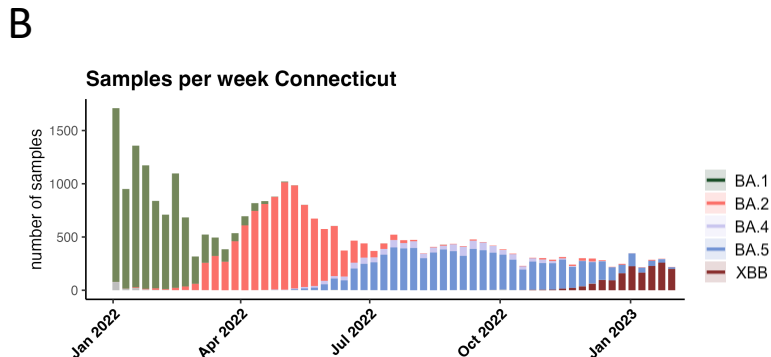

**Figure S2 Yale SARS-CoV-2 Genomic Surveillance Initiative in 2022 (A)** Frequency of % sequenced (red line) versus reported cases (grey bars) **(B)** Number and distribution of SARS-CoV-2 samples deposited on GISAID throughout 2022

# Supplementary Figure 3

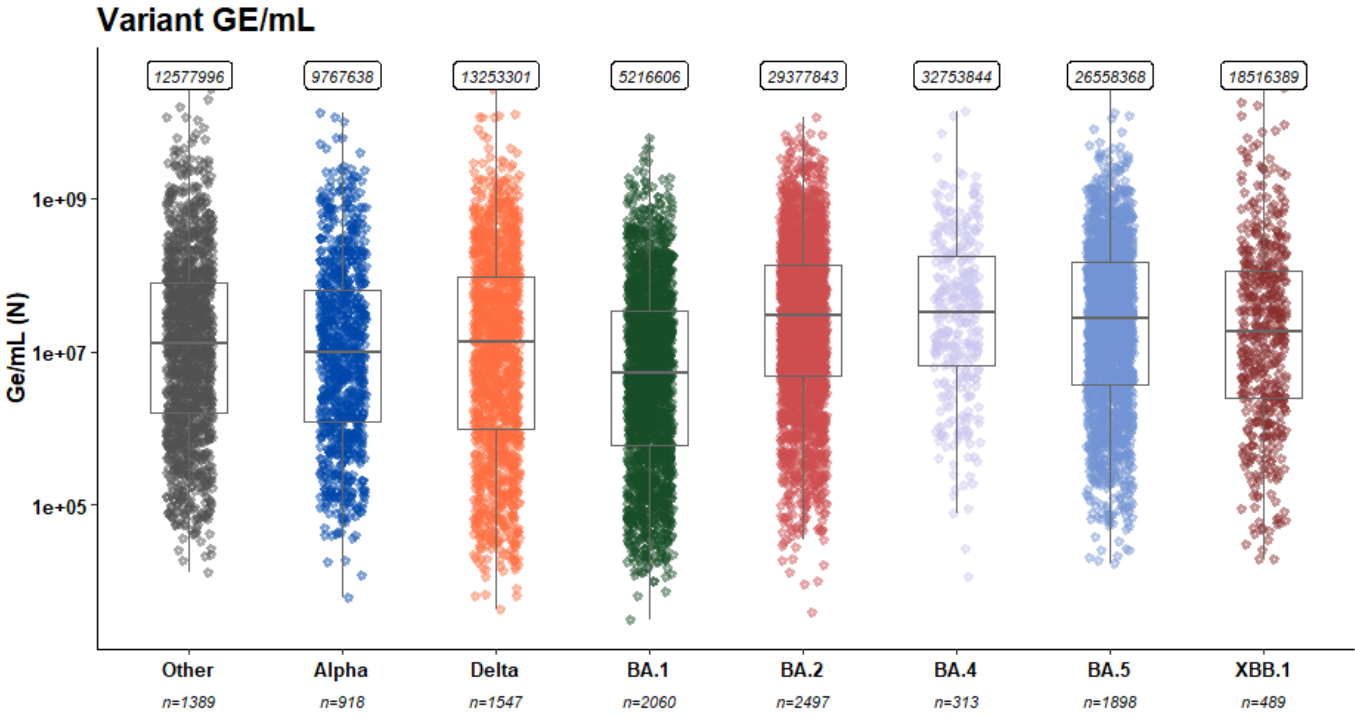

**Figure S3 Genome equivalents retrieved from qPCR assay.** qPCR Ct values were fitted to a standard curve to retrieve genome equivalents per ml.

# Supplementary Figure 4

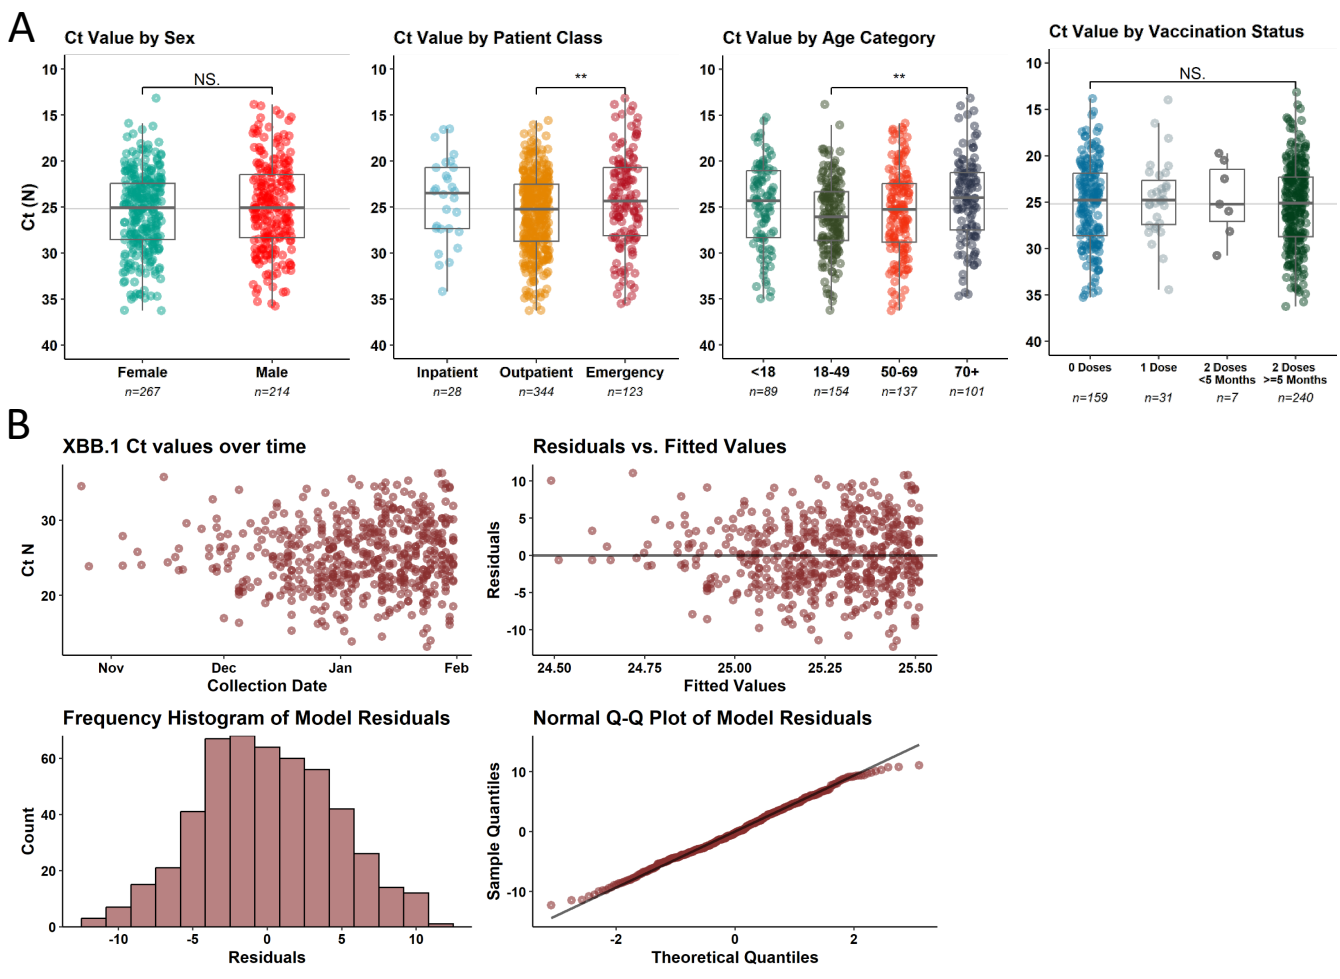

**Figure S4 Analysis of viral loads measured in early XBB samples (A) Samples stratified according to sex, patient class and vaccination status (B) Raw data and plotted trend from XBB samples**
